# Supplementary material for: Phylogenetic Molecular Species Delimitations Unravel Potential New Species in the Pest Genus Spodoptera Guenée, 1852 (Lepidoptera, Noctuidae)
Source: PubMed Central journal article supplement (PMC4390195; doi:10.1371/journal.pone.0122407), 2015-04-08

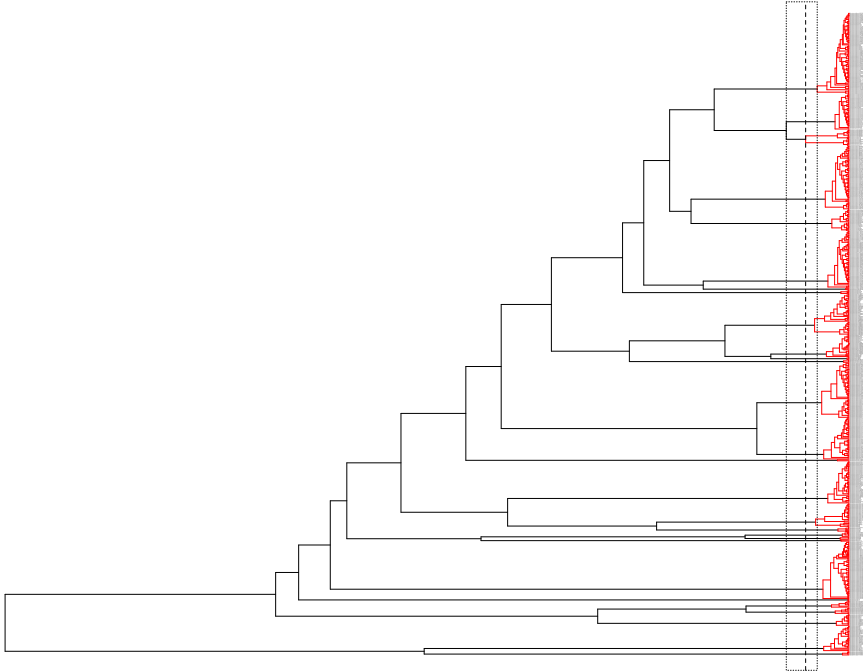

Supplement: pone.0122407.s005.pdf [file pone.0122407.s005.pdf]
